# Supplementary material
Source: publisher site journal article supplement (https://www.degruyter.com/publication/journal_key/SJPAIN/downloadAsset/SJPAIN_SJPAIN_Article%20Processing%20Charges.pdf)
Supplement: Supplementary file 1 [file SJPAIN_SJPAIN_Article%20Processing%20Charges.pdf]

## Article Processing Charges

EFFECTIVE MARCH 2024

---

In order to sustain the production of our fully refereed open access journal, each article accepted for publication in *Scandinavian Journal of Pain* is subject to an Article Processing Charge (APC) of €2000. This fee is used to cover the costs of the peer-review process, professional typesetting and copyediting, as well as online hosting, long-term preservation, distribution to libraries and content aggregators worldwide, and extensive promotion to potential readers. There is no submission fee.

Editors and reviewers are not involved in author payment process and do not discuss charges with authors. The ability to pay does not influence whether or not a manuscript is accepted for publication.

Information regarding payment of these charges will be provided following acceptance for publication. Inquiries concerning Article Processing Charges should be addressed to the Editorial Office.

Articles Processing Charges are collected via RightsLink system (provided by Copyright Clearance Center). The payment can be made in EUR, USD or GBP, and may be subject to VAT when applicable.

## Funding Support and Waiver Policies

### Society discounts:

Society members of Scandinavian Association for the Study of Pain are entitled to a discount of 20% on Article Processing Charges.

Authors who are looking for funds to support the payment of Article Processing Charges have a number of options to consider. For details, visit [our website](#).

If the submitting author is affiliated with an organization which has [an open access agreement](#) with De Gruyter, the Article Processing Charges (APCs) may be covered or discounted. Moreover, authors can apply for a discount or a waiver during the submission process. Authors are asked to contact the journal Editorial Office before, or straight after submitting their article.

Editorial Office:

Managing Editor

Małgorzata Milewska

De Gruyter Poland Ltd.

Bogumiła Zuga 32A

01-811 Warsaw / Poland

Tel: +48 22 701 50 15

Email: [sjpain.editorial@degruyter.com](mailto:sjpain.editorial@degruyter.com); [malgorzata.milewska@degruyter.com](mailto:malgorzata.milewska@degruyter.com)

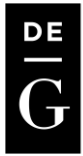

DE GRUYTER

Scandinavian Journal of Pain

Editor in Chief

Mads U. Werner

Multidisciplinary Pain Center, Neuroscience Center

Copenhagen University Hospital-Rigshospitalet,

Copenhagen, Denmark

Email: [sjpainmw@gmail.com](mailto:sjpainmw@gmail.com)
